# Supplementary material
Source: Copernicus journal article supplement (doi:10.5194/amt-19-3083-2026)
Supplement: Supplementary file 1 [file amt-19-3083-2026-supplement.pdf]

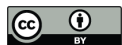

*Supplement of*

## **A drone-based sampling platform for vertically resolved chemical characterization of aerosol particles using chemical ionization mass spectrometry**

**Leo Håkansson et al.**

*Correspondence to:* Cheng Wu ([cheng.wu@gu.se](mailto:cheng.wu@gu.se))

The copyright of individual parts of the supplement might differ from the article licence.

**Table S1.** Summary of measurements

| Measurement                      | Height MAGL | Filter sampling time (h) | Description                                                                                                                                               | Date           |
|----------------------------------|-------------|--------------------------|-----------------------------------------------------------------------------------------------------------------------------------------------------------|----------------|
| Hovering                         | 8           | 3                        | Comparison of drone and ground-based while drone is hovering, simultaneous stationary and drone based sensor measurements                                 | 11 May 2025    |
| Grounded                         | 2           | 3                        | Comparison of drone and ground-based while drone is grounded                                                                                              | 10 May 2025    |
| Vertical profile test            | 2–120       | –                        | Vertical profiles of T, RH, wind speed and direction between 19:30 and 02:30                                                                              | 24 Apr 2024    |
| Nocturnal boundary layer profile | 2–120       | 1.5                      | Vertical profiles of T, RH, wind speed and direction during the nocturnal boundary layer profiling, simultaneous ground and drone based filter collection | 14-15 Apr 2025 |

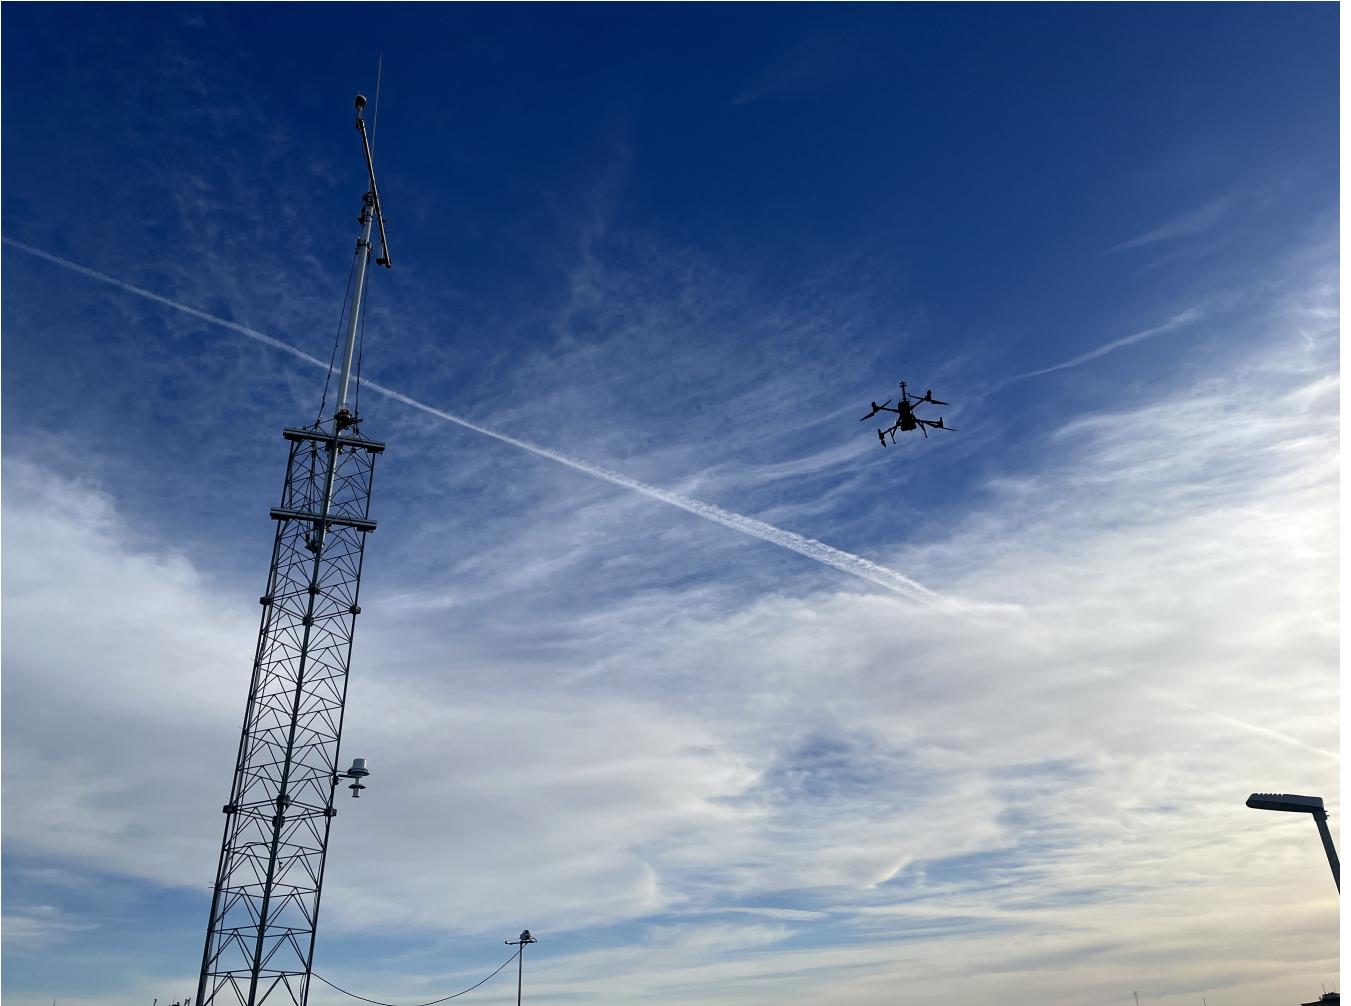

**Figure S1.** Drone setup used in comparison measurements. On the left: Natrium Atmospheric and climate measurement tower.

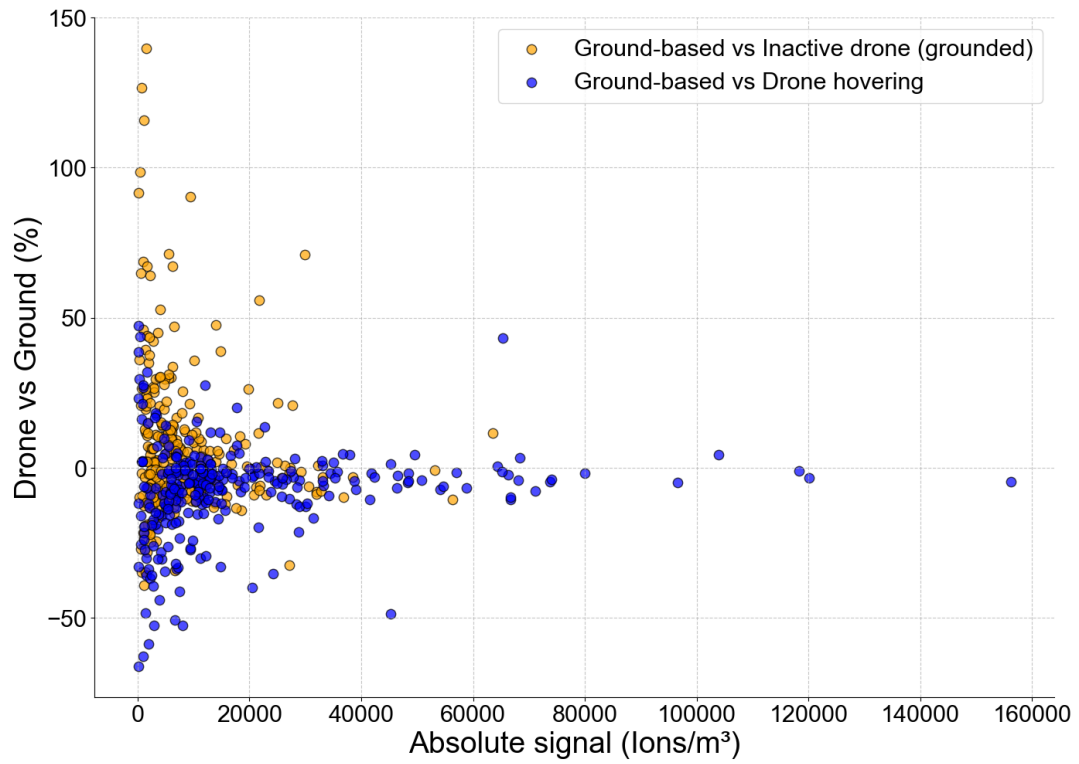

**Figure S2.** Distribution of relative difference between drone and ground-based measurements  $((\text{drone-ground})/\text{ground})$  as a function of absolute signal of ground-based measurements.

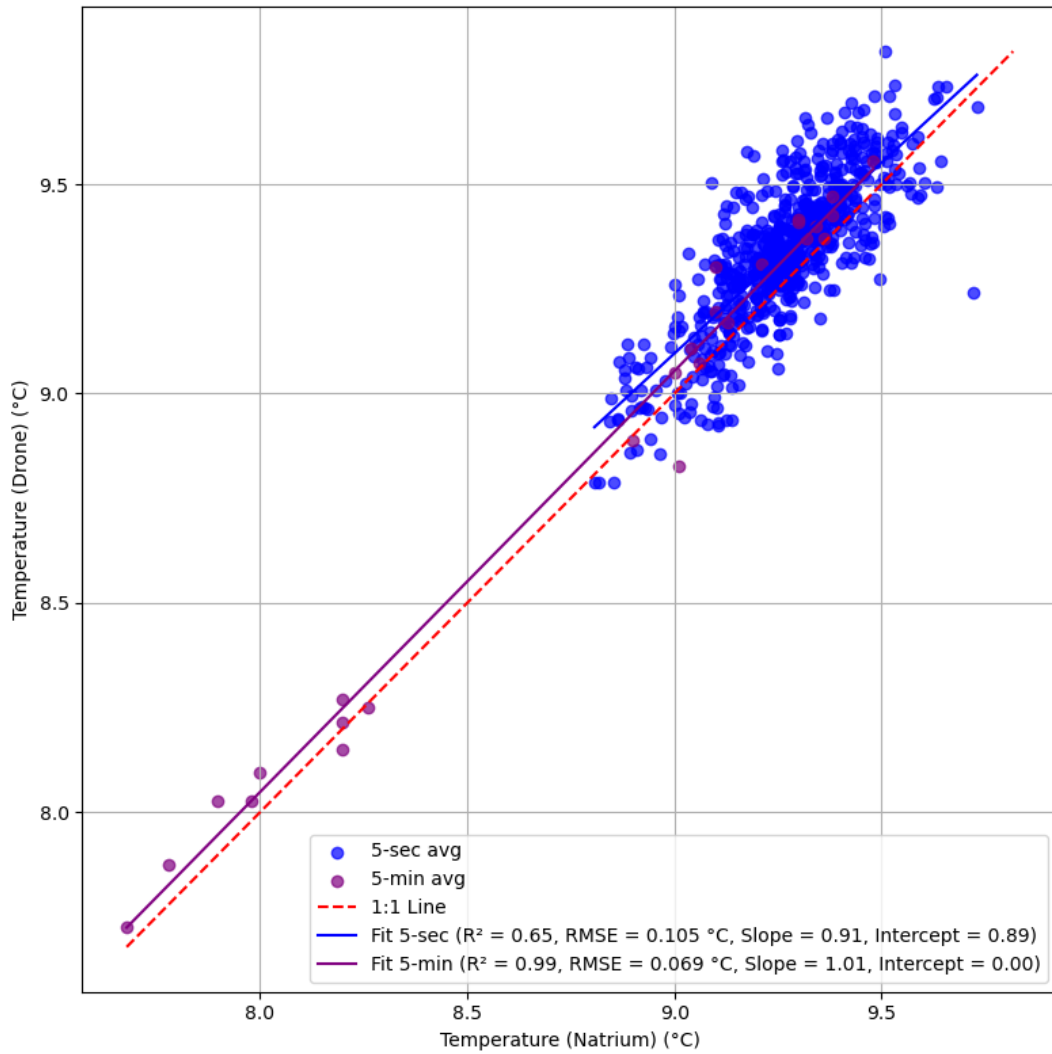

**Figure S3.** Temperature correlation plot between drone and ground-based (Natrium) measurements.

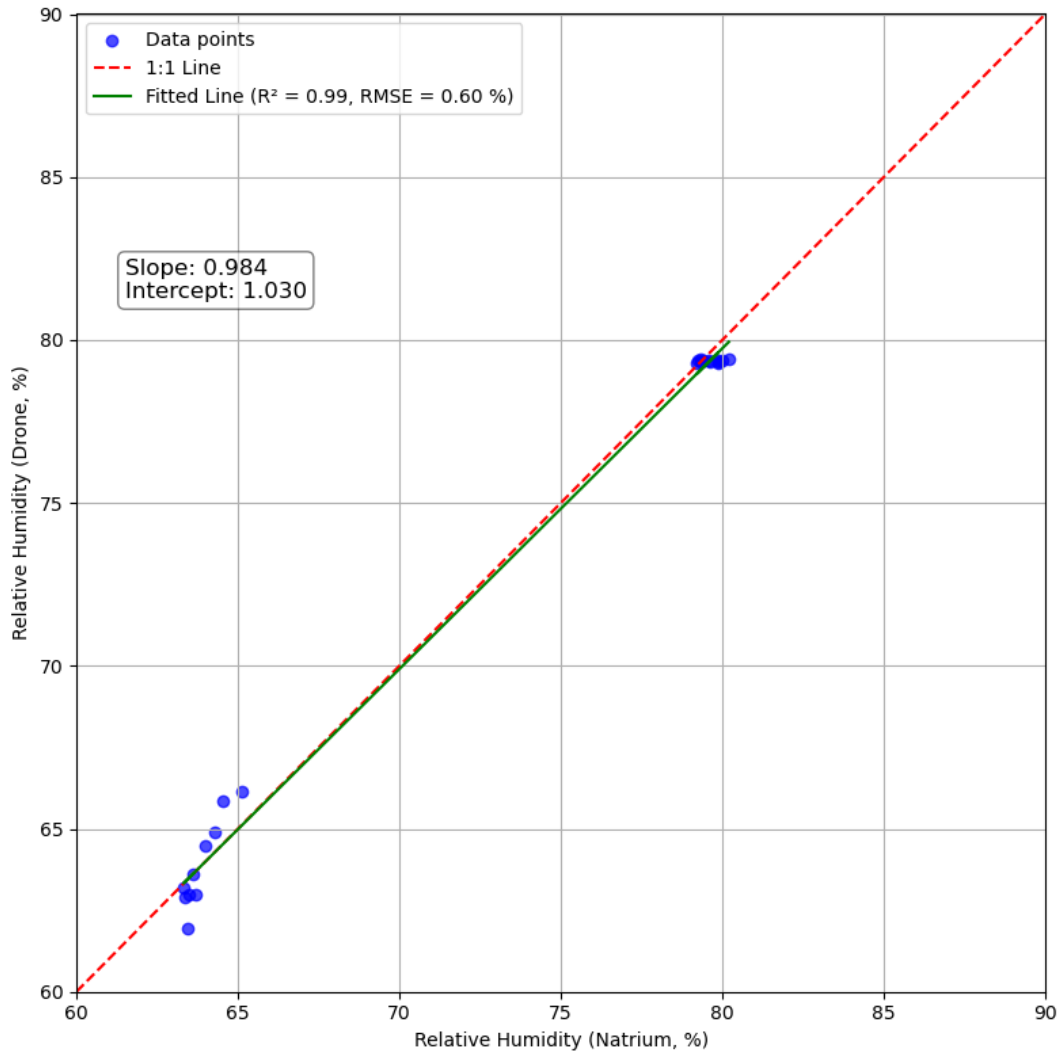

**Figure S4.** Relative humidity (RH) correlation plot between drone and ground-based (Natrium) measurements.
